# Supplementary material for: The impact of the COVID-19 lockdown on HIV care in 65 South African primary care clinics: an interrupted time series analysis
Source: PubMed Central journal article supplement (PMC8011055; doi:10.1016/s2352-3018(20)30359-3), 2021-02-04
Supplement: mmc1.pdf [file mmc1.pdf]

# THE LANCET HIV

## Supplementary appendix

This appendix formed part of the original submission and has been peer reviewed. We post it as supplied by the authors.

Supplement to: Dorward J, Khubone T, Gate K, et al. The impact of the COVID-19 lockdown on HIV care in 65 South African primary care clinics: an interrupted time series analysis. *Lancet HIV* 2021; published online Feb 4. [http://dx.doi.org/10.1016/S2352-3018\(20\)30359-3](http://dx.doi.org/10.1016/S2352-3018(20)30359-3).

## Supplementary Material

### Formula for Poisson regression models

*Calculating the change in outcome at lockdown, no seasonality*

$$\log(y) = b_0 + b_1t + b_2x + b_3xt$$

where y = mean outcome of interest, x = lockdown indicator and t = time in weeks since the start of the study.

*Calculating the change in outcome at time T*

To estimate the intervention at this timepoint, we centre t about T

$$\log(y) = b_0 + b_1(t - T) + b_2x + b_3x(t - T)$$

*Model including seasonality*

$$\log(\text{mean initiations}) = b_0 + b_1t + b_2x + b_3xt + b_4 \sin\left(\frac{2\pi t}{52}\right) + b_5 \cos\left(\frac{2\pi t}{52}\right) + b_6 \sin\left(\frac{4\pi t}{52}\right) + b_7 \cos\left(\frac{4\pi t}{52}\right)$$

**Table S1: Segmented Poisson regression models of the impact of COVID-19 lock-down on positive HIV tests at 65 clinics in KwaZulu-Natal, South Africa**

|                                                                    | <b>Incidence rate ratio at lock-down (95% CI)</b> | <b>Incidence rate ratio at study end (95% CI)</b> | <b>Pre-lockdown trend<sup>a</sup> (95% CI)</b> | <b>Post-lockdown trend<sup>a</sup> (95% CI)</b> |
|--------------------------------------------------------------------|---------------------------------------------------|---------------------------------------------------|------------------------------------------------|-------------------------------------------------|
| Positive HIV test results <sup>b</sup>                             | 0.611 (0.532-0.702)                               | 0.739 (0.634-0.861)                               | 0.993 (0.986-1.000)                            | 1.057 (1.017-1.100)                             |
| Positive HIV test results, accounting for seasonality <sup>b</sup> | 0.602 (0.511-0.710)                               | 0.696 (0.571-0.848)                               | 0.994 (0.988-1.001)                            | 1.044(0.964-1.130)                              |

<sup>a</sup> Slope change per month <sup>b</sup> Autocorrelation addressed using Newey-West standard errors to calculate confidence interval, with lag up to 2.

## Sample R code for Poisson regression models, using ART initiations as an example

```
#####  
## Install and load packages  
#####  
# install.packages("sandwich"); install.packages("tidyverse"); install.packages("tsModel")  
library(sandwich); library(tidyverse); library(tsModel)  
  
#####  
### Centre time  
#####  
  
data$time_c <- data$time - 118 # Time centred at lockdown  
data$time_e <- data$time - 128 # Time centred at end of the study period  
  
#####  
### Poisson regression model of ART initiations pre and post lockdown  
#####  
  
model_init <- glm(init_n ~ lock_d + time + lock_d:time_c, family = poisson, data)  
summary(model_init)  
  
## Look at residuals for autocorrelation  
  
data$res1 <- residuals(model_init, type = "deviance")  
ggplot(data = data, mapping = aes(x = time, y = res1,)) +  
  geom_point(aes(colour = lock_d))  
acf(data$res1)  
pacf(data$res1)  
  
## Calculate Newey-West standard errors using lag 3  
  
est <- exp(c(coef(model_init)["lock_d:time_c"], coef(model_init)["lock_d"], coef(model_init)["time"]))  
se1 <- sqrt(diag(NeweyWest(model_init, prewhite = F, lag = 3))["lock_d:time_c"]  
se2 <- sqrt(diag(NeweyWest(model_init, prewhite = F, lag = 3))["lock_d"]
```

```

se3 <- sqrt(diag(NeweyWest(model_init, prewhite = F, lag = 3))["time"])
lb <- est * exp(-1.96 * c(se1, se2, se3))
ub <- est * exp(1.96 * c(se1, se2, se3))
table <- cbind(round(est, digits = 3), round(lb, digits = 3), round(ub, digits = 3))
table

## Calculate post-lockdown trend and confidence intervals

V <- NeweyWest(model_init, prewhite = F, lag = 3)
se <- sqrt(V["time", "time"] + V["lock_d:time_c", "lock_d:time_c"]
          + 2 * V["time", "lock_d:time_c"])
slope_post <- sum(coef(model_init)[c("time", "lock_d:time_c")])
lower <- slope_post - 1.96 * se
upper <- slope_post + 1.96 * se
exp(cbind(slope_post, lower, upper))

## Estimate the impact of lockdown at the end of the study period

model_init_end <- glm(init_n ~ lock_d + time + lock_d:time_e, family = poisson, data)
summary(model_init_end)

#####
### Poisson regression model of ART initiations adjusting for seasonality
#####
# Specifying the number of sin and cosine pairs to include (2) and the interval (52 weeks)

model_seas <- glm(init_n ~ lock_d + time + lock_d:time_c + harmonic(wk, 2, 52),
                  family = poisson, data)
summary(model_seas)

```
